# Supplementary material
Source: PubMed Central journal article supplement (PMC5626608)
Supplement: NIHMS891612-supplement-2.pdf [file NIHMS891612-supplement-2.pdf]

Supplementary Table 1. Primer and si/shRNA sequences.

|                                      |                            |  |
|--------------------------------------|----------------------------|--|
| qPCR IFIT1-F                         | GATCAGCCATATTTTCATTTTGAATC |  |
| qPCR IFIT1-R                         | GAAAATTCTCTTCAGCTTTTCTGTG  |  |
| qPCR IFIT2-F                         | AAGAGGAAGATTTCTGAAGAGTGC   |  |
| qPCR IFIT2-R                         | TCTCCAAGGAATTCTTATTGTTCTC  |  |
| qPCR IFIT3-F                         | GGAACAGCAGAGACACAGAGG      |  |
| qPCR IFIT3-R                         | ACACTGTCTTCCTTGAATAAGTTCC  |  |
| qPCR OAS1-F                          | GTGTGTGTCCAAGGTGGTAAAG     |  |
| qPCR OAS1-R                          | ATTTAACTGATCCTGAAAAGTGGTG  |  |
| qPCR B-actin F                       | AGAAAATCTGGCACCACACC       |  |
| qPCR B-actin R                       | GCTGGGGTGTGAAGGTCTC        |  |
| qPCR OAS2-F                          | CAAAGAAGCAAAGGAATGGTTATC   |  |
| qPCR OAS2-R                          | ATGGATCCTAGCTCCACAACCTC    |  |
| qPCR IRF9-F                          | GAGAGGAAGGAGGAAGAGGATG     |  |
| qPCR IRF9-R                          | TCCCAATGTCTGAATGGACTG      |  |
| qPCR PR-F                            | GTCAGTGGGCAGATGCTGTA       |  |
| qPCR PR-R                            | TGCCACATGGTAAGGCATAA       |  |
| CHIP IFIT3 PRE-F                     | CTCATGACTGCCCTCTGTGTC      |  |
| CHIP IFIT3 PRE-R                     | CTTCAGTATTTACTTGAGGCAGACAG |  |
| CHIP IFIT3 ISRE-F                    | TGTAAGTTGAGTTTCTTACTGTGCAG |  |
| CHIP IFIT3 ISRE-R                    | AACCCCTCAAACATCTTACAAATGC  |  |
| CHIP IFIT2(up) PRE-F                 | GATGGAAGCCTTTAGCAATCC      |  |
| CHIP IFIT2(up) PRE-R                 | ACATGCTTGTTAAGAACGTTTCAG   |  |
| CHIP IFIT2(down) PRE-F               | AATGTATGGGAAAAGAAAGTTACTGG |  |
| CHIP IFIT2(down) PRE-R               | ACAGACACGGAAGAGATTATCATTG  |  |
| CHIP IFIT2 ISRE-F                    | CAGACCCATCTTTAAGTGAAGCAC   |  |
| CHIP IFIT2 ISRE-R                    | GCTGAGTTGTGATCAGAGAAAGAAG  |  |
| CHIP IFIT1 PRE-F                     | TTCTCCAATGCTTAAGTTTCATTTT  |  |
| CHIP IFIT1 PRE-R                     | GAGAGAGAGAGAGAGTGTGTGTGTG  |  |
| CHIP IFIT1 ISRE-F                    | ACAAGACAGAATAGCCAGATCTCAG  |  |
| CHIP IFIT1 ISRE-R                    | GAGCAAAGAAATCCTTACCTCATGG  |  |
| ChIP OAS1 PRE-F                      | GATTACATCGGTGAGTGTTCCCTAAC |  |
| ChIP OAS1 PRE-R                      | AAGAATAGCAATGACCTCAACTCTC  |  |
| CHIP OAS1 ISRE-F                     | GTCAGCAGAAGAGATAAAAAGCAAAC |  |
| CHIP OAS1 ISRE-R                     | GGTATTTCTGAGATCCATCATTGAC  |  |
| CHIP OAS2 PRE-F                      | GCATAATACCCACTTCAGAGTATCG  |  |
| CHIP OAS2 PRE-R                      | TGTGGAGAGGATAGAAGAAAATCG   |  |
| CHIP OAS2 ISRE-F                     | CTGGGTGCCTATTATGTGCGAG     |  |
| CHIP OAS2 ISRE-R                     | ATTTTACAGAGTCAGAGACTGAGGC  |  |
| PGR siRNA pool oligo #1              | GGACGUGGAGGGCGCAUUAU       |  |
| PGR siRNA pool oligo #2              | GAGAUGAGGUCAAGCUACA        |  |
| PGR siRNA pool oligo #3              | ACAUUUGAUGACCAGAUUA        |  |
| PGR siRNA pool oligo #4              | GCACCUGAUCUAAUACUAA        |  |
| PGR shRNA target clone# V2LHS_239356 | CAGATAACTCTCATTTCAGT       |  |
| PGR shRNA target clone# V3LHS_355882 | AGGTCAAGACATACAGTTG        |  |
| PGR shRNA target clone# V3LHS_355883 | ACAGCGTTTCTATCAACTT        |  |
|                                      |                            |  |
